# Supplementary material
Source: Research Square preprint supplement (doi:10.21203/rs.3.rs-9817990/v1)
Supplement: Supplementary file 1 [file d455be361cdfeb73095b587a.docx]

**Appendix 1. Cronbach’s alpha by country and by year**

| **Country** | **Year** | **Cronbach's α** | **N** |
| --- | --- | --- | --- |
| ARG | 2020 | 0.804 | 1,200 |
| URY | 2020 | 0.776 | 1,200 |
| PRY | 2020 | 0.758 | 1,200 |
| ARG | 2023 | 0.757 | 1,200 |
| CHL | 2023 | 0.735 | 1,200 |
| URY | 2023 | 0.675 | 1,200 |
| BRA | 2020 | 0.658 | 1,204 |
| CRI | 2020 | 0.655 | 1,000 |
| CHL | 2024 | 0.652 | 1,200 |
| CHL | 2020 | 0.651 | 1,200 |
| VEN | 2020 | 0.639 | 1,200 |
| ARG | 2024 | 0.626 | 1,210 |
| URY | 2024 | 0.621 | 1,200 |
| COL | 2020 | 0.617 | 1,200 |
| PER | 2020 | 0.593 | 1,200 |
| NIC | 2020 | 0.572 | 1,000 |
| ECU | 2020 | 0.571 | 1,200 |
| ECU | 2023 | 0.561 | 1,200 |
| BOL | 2020 | 0.553 | 1,200 |
| CRI | 2023 | 0.550 | 1,000 |
| BRA | 2023 | 0.549 | 1,204 |
| MEX | 2020 | 0.541 | 1,200 |
| MEX | 2024 | 0.539 | 1,200 |
| COL | 2023 | 0.534 | 1,200 |
| PAN | 2020 | 0.527 | 1,000 |
| COL | 2024 | 0.514 | 1,200 |
| SLV | 2020 | 0.506 | 1,000 |
| ECU | 2024 | 0.503 | 1,200 |
| VEN | 2024 | 0.494 | 1,200 |
| HND | 2020 | 0.483 | 1,000 |
| PRY | 2023 | 0.461 | 1,200 |
| BRA | 2024 | 0.461 | 1,204 |
| DOM | 2023 | 0.457 | 1,000 |
| GTM | 2020 | 0.449 | 1,000 |
| VEN | 2023 | 0.444 | 1,201 |
| GTM | 2023 | 0.431 | 1,000 |
| BOL | 2023 | 0.427 | 1,200 |
| HND | 2023 | 0.423 | 1,000 |
| PAN | 2023 | 0.399 | 1,000 |
| PAN | 2024 | 0.389 | 1,000 |
| DOM | 2020 | 0.379 | 1,000 |
| MEX | 2023 | 0.377 | 1,200 |
| PER | 2023 | 0.374 | 1,200 |
| SLV | 2023 | 0.369 | 1,000 |
| BOL | 2024 | 0.365 | 1,200 |
| CRI | 2024 | 0.365 | 1,000 |
| PER | 2024 | 0.347 | 1,200 |
| PRY | 2024 | 0.333 | 1,200 |
| DOM | 2024 | 0.322 | 1,000 |
| SLV | 2024 | 0.280 | 1,000 |
| HND | 2024 | 0.213 | 1,000 |
| GTM | 2024 | 0.180 | 1,000 |
| α > 0.70 considered acceptable. | | | |
